# Supplementary material
Source: ML conference proceedings conference paper supplement (https://proceedings.neurips.cc/paper_files/paper/2019/hash/98dce83da57b0395e163467c9dae521b-Abstract.html)
Supplement: Supplementary file [file 98dce83da57b0395e163467c9dae521b-Supplemental.zip]

---

# (Supplementary Material)

## The Point Where Reality Meets Fantasy: Mixed Adversarial Generators for Image Splice Detection

---

**Vladimir V. Kniaz, Vladimir A. Knyaz**  
State Res. Institute of Aviation Systems (GosNIIAS)  
125319, 7, Victorenko str., Moscow, Russia  
{vl.kniaz, knyaz}@gosniias.ru

**Fabio Remondino**  
FBK, Trento, Italy  
remondino@fbk.eu

### 1 FantasticReality Dataset

We present examples of splices and object classes annotations in our FantasticReality in Figures 1 and 2. Class annotations are labeled with colors and spliced object is labeled with grey color.

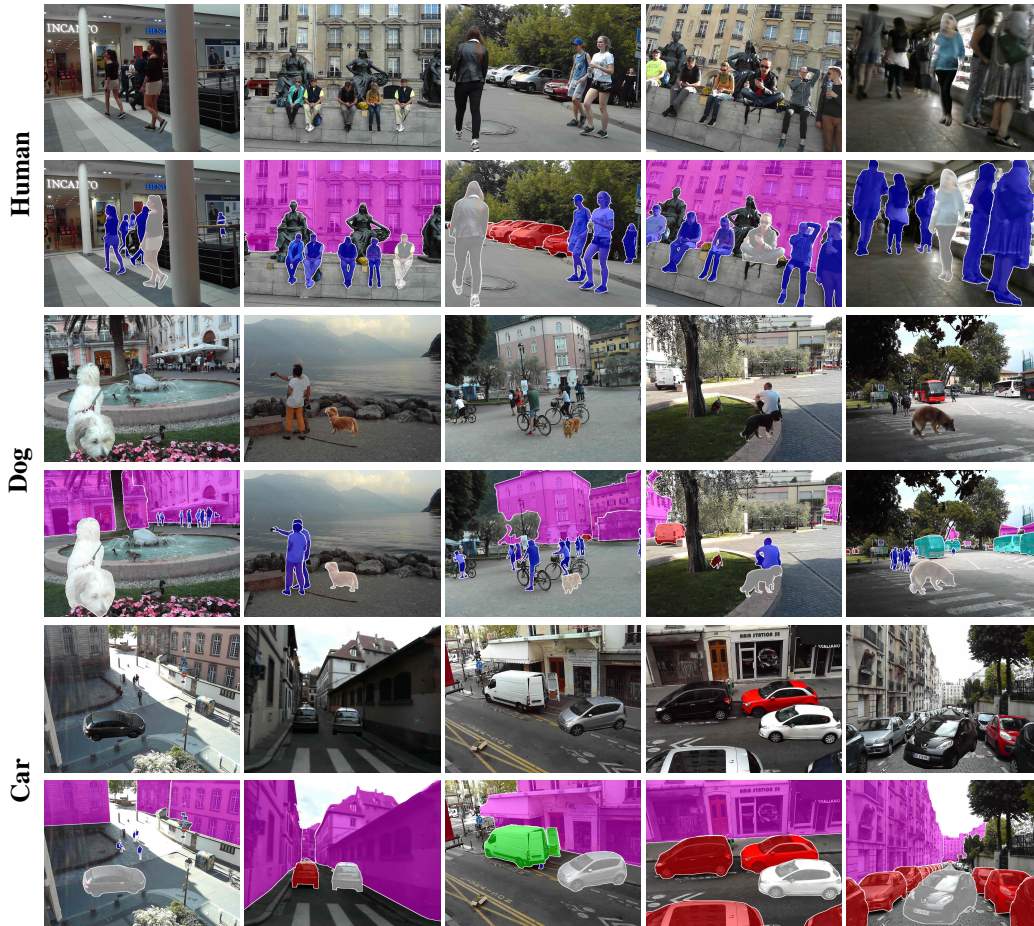

Figure 1: Examples of annotated images in our FantasticReality dataset.

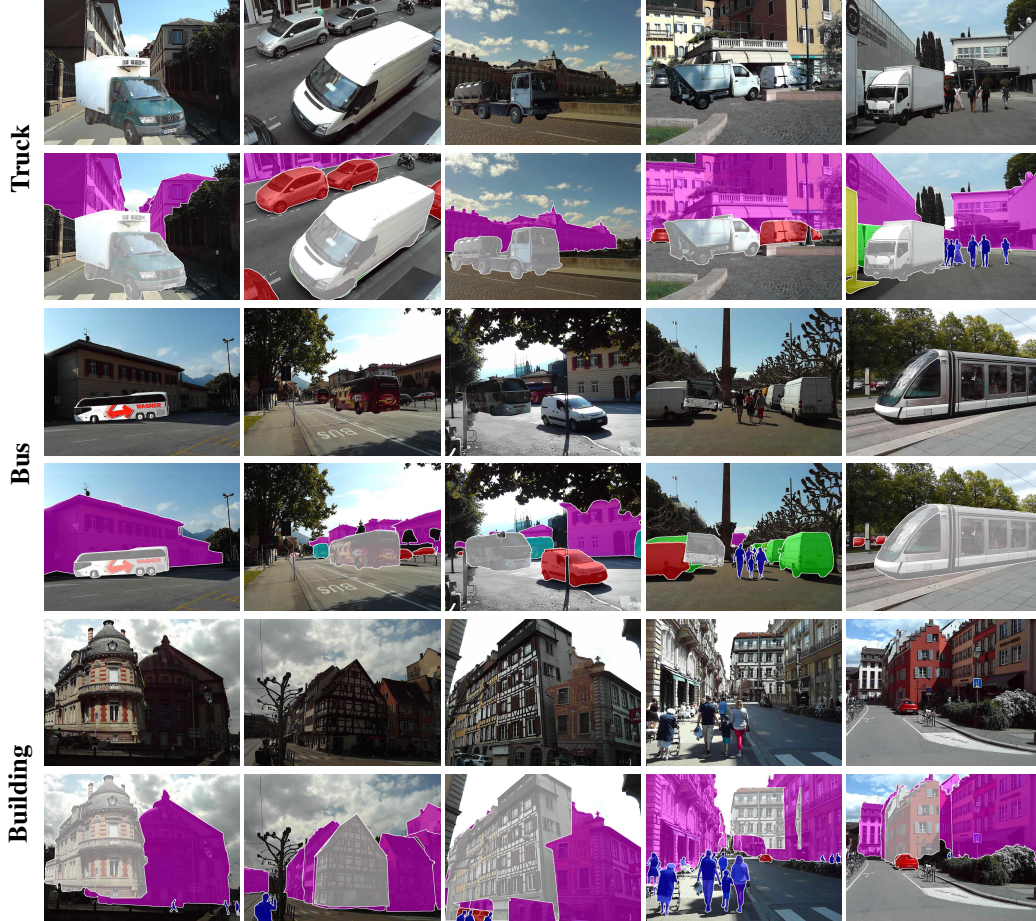

Figure 2: Examples of annotated images in our FantasticReality dataset.

The dataset is divided into two splits: ‘Rough’ and ‘Realistic’. ‘Rough’ split contains 8k splices with obvious artifacts such as aliasing at splice edges, light and color inconsistencies. We use the ‘Rough’ split to allow gradual learning of our retouching generator  $G_R$ . The ‘Realistic’ split provides 8k splices that were retouched manually to be visually indistinguishable from the authentic background image. We use the ‘Realistic’ split to test our model and baselines.

## 2 Modern-to-Retro Dataset

We present examples of splices and object classes annotations in the *modern*→*retro* in Figure 3. We manually generated ground truth annotations of instance and class labels for ten object categories: person, car, truck, van, bus, building, cat, dog, tram, boat.

## 3 Evaluation Protocol

**Datasets.** *CASIA v2.0* [1] consists of 5123 tampered images with various kinds of objects and tampering artifacts. The dataset does not provide the ground truth maps of tampered regions. We generate ground truth segmentation for CASIA v2.0 dataset similar to [2] by subtraction of tampered and authentic images. *Carvalho* [3] dataset includes 100 spliced human portraits and ground truth tampering masks. *Columbia* [4] dataset consists of 180 splices with objects of different categories. *Realistic Tampering* [5] dataset includes 165 images with challenging splices. All splices are carefully processed to be indistinguishable from the background image. For the fair evaluation, we downscale all images to match the input size  $512 \times 512$  of our annotator generator  $G_R$ . We use the downscaled images to evaluate all baselines and our framework.



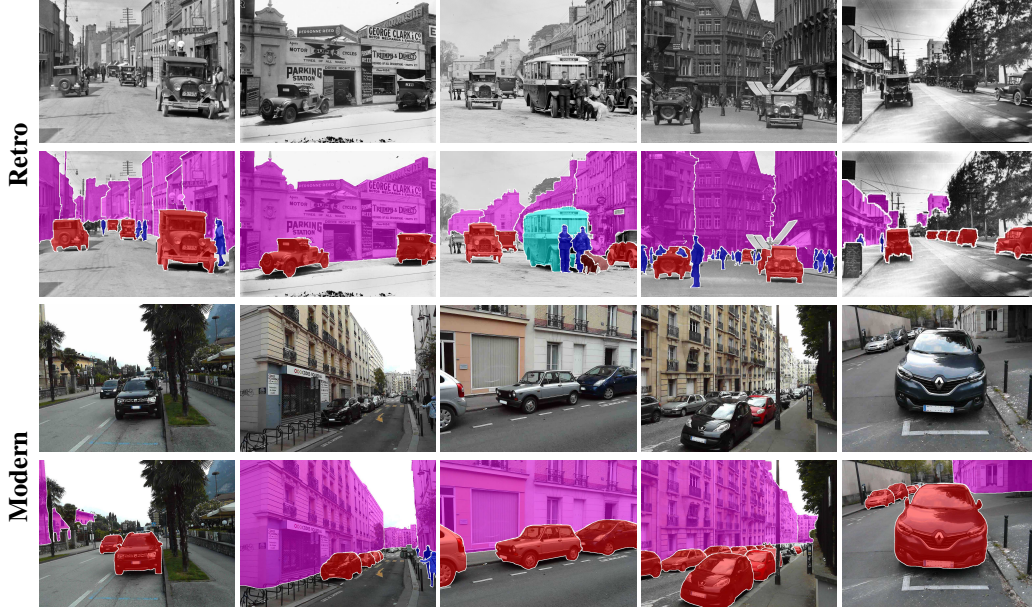

Figure 3: Examples of annotated images in our *modern*→*retro* dataset.

**Baselines.** We compare our model with five modern splice detection methods: ManTra [6], LSC [7], MFCN [8], NOI [9], CFA [10], DCT [11]. ManTra-Net (ManTra) [6] is a self-supervised model that learns to classify 385 image manipulation types. Learned Self-Consistency (LSC) [7] is a self-supervised model. Multi-Task Fully Convolutional Network (MFCN) [8] leverages a deep two-stream architecture to predict splice mask and splice edge mask. Noise Variance (NOI) [9] leverages wavelet analysis to detect inconsistency in noise patterns. Color Filter Array (CFA) [10] searches for inconsistencies in artifacts of demosaicking algorithm to detect tampered regions. JPEG DCT [11] leverages inconsistencies of JPEG blocking artifact to detect tampered image regions. For the LSC algorithm, we use a pertained model provided by authors. We implemented the MFCN model and train it on the training split of our FantasticReality dataset. We train our MAG model on the ‘Rough’ split of our FantasticReality dataset. We use a batch size of one and an Adam solver with initial learning rate of  $2 \cdot 10^{-4}$ . We trained our MAG model for 400 epochs.

If two images are used for splice generation, the choice of ‘authentic’ and ‘tampered’ regions is ambiguous. To avoid ambiguity, we follow the method proposed in [7]. Namely, we compare the areas of the ‘background’ image and the ‘pasted’ images. We define the smaller region as the tampered. If the regions are equal, we calculate the mAP score for the original tampering mask and an inverted mask. We use the higher score and term it permuted mAP (p-mAP) similar to [7].

## 4 Network Architecture

The architecture of our generator U-Net-UC is presented in Table 1. Our main contribution to the U-Net generator [12] architecture is in the decoder part. we replaced deconvolutional layers with an upsample layer followed by a convolutional layer, inspired by the architecture proposed in [13].

### 4.1 Semantic-guided Retoucher Generator $G_R$ Evaluation

We evaluate our retoucher generator  $G_R$  ability to perform semantic-guided image-to-image translation on a *modern*→*retro* task. We compare our MAG model against three image-to-image translation models: CycleGAN [14], UNIT [15], and AGGAN [16].

**Baselines.** CycleGAN [14] model performs unpaired image-to-image translation using cycle consistency. Unsupervised Image-to-Image Translation Networks (UNIT) [15] uses a shared-latent space assumption to learn a latent representation that connects images in source and target domains. Unsu-

| Name     | Kernel       | Str. | Ch I/O   | In Res           | Out Res          | Input            |
|----------|--------------|------|----------|------------------|------------------|------------------|
| conv0    | $4 \times 4$ | 2    | 4/64     | $512 \times 512$ | $256 \times 256$ | Input image      |
| conv1    | $4 \times 4$ | 2    | 4/64     | $256 \times 256$ | $128 \times 128$ | conv0            |
| conv2    | $4 \times 4$ | 2    | 64/128   | $128 \times 128$ | $64 \times 64$   | conv1            |
| conv3    | $4 \times 4$ | 2    | 128/256  | $64 \times 64$   | $32 \times 32$   | conv2            |
| conv4    | $4 \times 4$ | 2    | 256/512  | $32 \times 32$   | $16 \times 16$   | conv3            |
| conv5    | $4 \times 4$ | 2    | 512/512  | $16 \times 16$   | $8 \times 8$     | conv4            |
| conv6    | $4 \times 4$ | 2    | 512/512  | $8 \times 8$     | $4 \times 4$     | conv5            |
| conv7    | $4 \times 4$ | 2    | 512/512  | $4 \times 4$     | $2 \times 2$     | conv6            |
| conv8    | $4 \times 4$ | 2    | 512/512  | $2 \times 2$     | $1 \times 1$     | conv7            |
| upscale8 | —            | —    | 512/512  | $1 \times 1$     | $2 \times 2$     | conv8            |
| pad8     | —            | —    | 512/512  | $2 \times 2$     | $4 \times 4$     | upscale8         |
| conv_up8 | $3 \times 3$ | 1    | 512/512  | $4 \times 4$     | $2 \times 2$     | pad8             |
| upscale7 | —            | —    | 1024/512 | $2 \times 2$     | $4 \times 4$     | conv_up8 + conv7 |
| pad7     | —            | —    | 1024/512 | $4 \times 4$     | $6 \times 6$     | upscale7         |
| conv_up7 | $3 \times 3$ | 1    | 1024/512 | $6 \times 6$     | $4 \times 4$     | pad7             |
| upscale6 | —            | —    | 1024/512 | $4 \times 4$     | $8 \times 8$     | conv_up7 + conv6 |
| pad6     | —            | —    | 1024/512 | $8 \times 8$     | $10 \times 10$   | upscale6         |
| conv_up6 | $3 \times 3$ | 1    | 1024/512 | $10 \times 10$   | $8 \times 8$     | pad6             |
| upscale5 | —            | —    | 1024/512 | $8 \times 8$     | $16 \times 16$   | conv_up6 + conv5 |
| pad5     | —            | —    | 1024/512 | $16 \times 16$   | $18 \times 18$   | upscale5         |
| conv_up5 | $3 \times 3$ | 1    | 1024/512 | $18 \times 18$   | $16 \times 16$   | pad5             |
| upscale4 | —            | —    | 1024/256 | $16 \times 16$   | $32 \times 32$   | conv_up5 + conv4 |
| pad4     | —            | —    | 1024/256 | $32 \times 32$   | $34 \times 34$   | upscale4         |
| conv_up4 | $3 \times 3$ | 1    | 1024/256 | $34 \times 34$   | $32 \times 32$   | pad4             |
| upscale3 | —            | —    | 512/128  | $32 \times 32$   | $64 \times 64$   | conv_up4 + conv3 |
| pad3     | —            | —    | 512/128  | $64 \times 64$   | $66 \times 66$   | upscale3         |
| conv_up3 | $3 \times 3$ | 1    | 512/128  | $66 \times 66$   | $64 \times 64$   | pad3             |
| upscale2 | —            | —    | 256/64   | $64 \times 64$   | $128 \times 128$ | conv_up3 + conv2 |
| pad2     | —            | —    | 256/64   | $128 \times 128$ | $130 \times 130$ | upscale2         |
| conv_up2 | $3 \times 3$ | 1    | 256/64   | $130 \times 130$ | $128 \times 128$ | pad2             |
| upscale1 | —            | —    | 128/64   | $128 \times 128$ | $256 \times 256$ | conv_up2 + conv1 |
| pad1     | —            | —    | 128/64   | $256 \times 256$ | $258 \times 258$ | upscale1         |
| conv_up1 | $3 \times 3$ | 1    | 128/64   | $258 \times 258$ | $256 \times 256$ | pad1             |
| upscale0 | —            | —    | 128/2+K  | $256 \times 256$ | $512 \times 512$ | conv_up1 + conv0 |
| pad0     | —            | —    | 128/2+K  | $512 \times 512$ | $514 \times 514$ | upscale0         |
| conv_up0 | $3 \times 3$ | 1    | 128/2+K  | $514 \times 514$ | $512 \times 512$ | pad0             |

Table 1: The U-Net-UC generator architecture.

pervised Attention-guided Image-to-Image Translation (AGGAN) [16] leverages unsupervised attention learning to perform translation focused only on the target object class.

We introduce a new ‘*modern*→*retro*’ dataset with 2k images and class annotations for training models to translate modern cityscapes to retro photos of 1920-1930s (see supplementary material). This task is challenging as the model should translate the appearance of multiple object classes, while keeping the resulting image realistic.

**Qualitative results.** Results of translation are presented in Figure 4. While our model does not receive semantic labeling as an input, the semantic loss forces it to keep objects in the output image semantically consistent. All baselines fail to match old and new cars to perform *modern*→*retro* translation. Only UNIT model synthesizes an old car but in the wrong place. Our MAG model is focused on matching the semantic labels of input and target domains. Our structured loss combining adversarial and semantic losses makes the output of our model both realistic and semantically consistent.

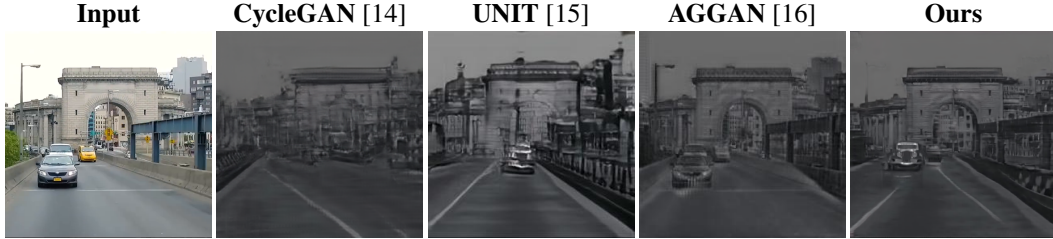

Figure 4: Comparison against three state-of-the-art methods on various image-to-image translation tasks. Our results are shown in the last column. See supplementary material for video example.

**Quantitative results.** We use Kernel Inception Distance [17] (KID) and user perceptual realism judgment to evaluate our retoucher generator  $G_R$  quantitatively. The KID represents the squared maximum mean discrepancy between deep feature representation of evaluated images. We compute the KID between the generated images and images from the target domain. To evaluate perceptual similarity, we run the test on the Amazon Mechanical Turk (AMT), similar to [18]. Quantitative results are presented in Figure 5 and Table 2. Our retouching generator  $G_R$  achieves the lowest KID distance. The UNIT framework is the next best performing method.

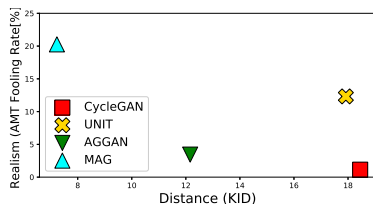

Figure 5: Realism vs. KID for synthesized images. Lower KID and high realism is better

| Method             | Realism              | Distance                          |
|--------------------|----------------------|-----------------------------------|
|                    | AMT Fooling Rate [%] | KID                               |
| Random real images | 50.0%                |                                   |
| AGGAN [16]         | 3.44                 | $18.45 \pm 0.73$                  |
| CycleGAN [14]      | 1.14                 | $17.92 \pm 0.43$                  |
| UNIT [15]          | 12.32                | $12.16 \pm 0.51$                  |
| Ours               | <b>20.26</b>         | <b><math>7.23 \pm 0.67</math></b> |

Table 2: Perceptual realism and Kernel Inception Distance  $\times 100 \pm \text{std.} \times 100$  for different image translation algorithms.

## References

- [1] Jing Dong, Wei Wang, and Tieniu Tan. CASIA image tampering detection evaluation database. In *2013 IEEE China Summit and International Conference on Signal and Information Processing, ChinaSIP 2013, Beijing, China, July 6-10, 2013*, pages 422–426, 2013.
- [2] Peng Zhou, Xintong Han, Vlad I Morariu, and Larry S Davis. Learning Rich Features for Image Manipulation Detection. In *The IEEE Conference on Computer Vision and Pattern Recognition (CVPR)*, June 2018.
- [3] T. J. d. Carvalho, C. Riess, E. Angelopoulou, H. Pedrini, and A. d. R. Rocha. Exposing digital image forgeries by illumination color classification. *IEEE Transactions on Information Forensics and Security*, 8(7):1182–1194, July 2013.
- [4] Tian-Tsong Ng and Shih-Fu Chang. A data set of authentic and spliced image blocks. Technical report, Columbia University, June 2004.
- [5] P. Korus and J. Huang. Multi-scale analysis strategies in prnu-based tampering localization. *IEEE Trans. on Information Forensics & Security*, 2017.
- [6] Wael AbdAlmageed Yue Wu and Premkumar Natarajan. Mantra-net: Manipulation tracing network for detection and localization of image forgeries with anomalous features. In *The IEEE Conference on Computer Vision and Pattern Recognition (CVPR)*, 2019.
- [7] Minyoung Huh, Andrew Liu, Andrew Owens, and Alexei A Efros. Fighting Fake News: Image Splice Detection via Learned Self-Consistency. In *The European Conference on Computer Vision (ECCV)*, September 2018.
- [8] Ronald Salloum, Yuzhuo Ren, and C C Jay Kuo. Image Splicing Localization using a Multi-task Fully Convolutional Network (MFCN). *Journal of Visual Communication and Image Representation*, 51:201–209, February 2018.
- [9] Babak Mahdian and Stanislav Saic. Using noise inconsistencies for blind image forensics. *Image and Vision Computing*, 27(10):1497 – 1503, 2009. Special Section: Computer Vision Methods for Ambient Intelligence.
- [10] P. Ferrara, T. Bianchi, A. De Rosa, and A. Piva. Image forgery localization via fine-grained analysis of cfa artifacts. *IEEE Transactions on Information Forensics and Security*, 7(5):1566–1577, Oct 2012.
- [11] S. Ye, Q. Sun, and E. Chang. Detecting digital image forgeries by measuring inconsistencies of blocking artifact. In *2007 IEEE International Conference on Multimedia and Expo*, pages 12–15, July 2007.
- [12] Olaf Ronneberger, Philipp Fischer, and Thomas Brox. U-Net: Convolutional Networks for Biomedical Image Segmentation. Springer International Publishing, Cham, 2015.
- [13] Tero Karras, Timo Aila, Samuli Laine, and Jaakko Lehtinen. Progressive growing of gans for improved quality, stability, and variation. In *6th International Conference on Learning Representations, ICLR 2018, Vancouver, BC, Canada, April 30 - May 3, 2018, Conference Track Proceedings*, 2018.
- [14] Jun-Yan Zhu, Taesung Park, Phillip Isola, and Alexei A Efros. Unpaired image-to-image translation using cycle-consistent adversarial networks. In *Computer Vision (ICCV), 2017 IEEE International Conference on*, 2017.
- [15] Ming-Yu Liu, Thomas Breuel, and Jan Kautz. Unsupervised image-to-image translation networks. In I. Guyon, U. V. Luxburg, S. Bengio, H. Wallach, R. Fergus, S. Vishwanathan, and R. Garnett, editors, *Advances in Neural Information Processing Systems 30*, pages 700–708. Curran Associates, Inc., 2017.
- [16] Youssef Alami Mejjati, Christian Richardt, James Tompkin, Darren Cosker, and Kwang In Kim. Unsupervised attention-guided image-to-image translation. In S. Bengio, H. Wallach, H. Larochelle, K. Grauman, N. Cesa-Bianchi, and R. Garnett, editors, *Advances in Neural Information Processing Systems 31*, pages 3693–3703. Curran Associates, Inc., 2018.
- [17] Mikolaj Binkowski, Dougal J. Sutherland, Michael Arbel, and Arthur Gretton. Demystifying MMD gans. In *6th International Conference on Learning Representations, ICLR 2018, Vancouver, BC, Canada, April 30 - May 3, 2018, Conference Track Proceedings*, 2018.
- [18] Phillip Isola, Jun-Yan Zhu, Tinghui Zhou, and Alexei A Efros. Image-to-Image Translation with Conditional Adversarial Networks. In *2017 IEEE Conference on Computer Vision and Pattern Recognition (CVPR)*, pages 5967–5976. IEEE, 2017.
